# Supplementary material for: Endophytic Fungi Piriformospora indica Mediated Protection of Host from Arsenic Toxicity
Source: PubMed Central journal article supplement (PMC5423915; doi:10.3389/fmicb.2017.00754), 2017-05-10
Supplement: Image1.pdf [file Image1.pdf]

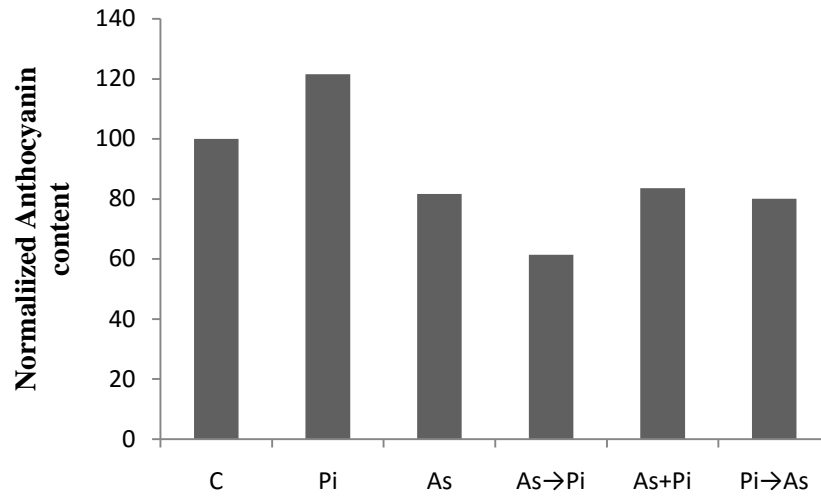

**Figure S5. Impact of arsenic on Anthocyanin content.** Anthocyanin content in the plants alternate and simultaneously treated with *P. indica* and arsenic. All experimental conditions were the same as described for Figure 1.
